# Supplementary material for: The influence of liquid Pb–Bi on the anti-corrosion behavior of Fe3O4: a first-principles study
Source: Royal Society of Chemistry journal article supplement (doi:10.1039/c5cp07564e), 2016-01-01
Supplement: c5cp07564e1.pdf [file c5cp07564e1.pdf]

**Fe3O4:**

Fe3O4

1. 000000000000000  
8. 3909244189690053 -0. 0176787746216709 0. 0000429717143815  
-0. 0176787870322384 8. 3909279851395127 -0. 0000422316651361  
0. 0000429135514187 -0. 0000421747791365 8. 4229010557327069

0 Fe  
32 24

Direct

0. 1175622828502441 0. 3824380177809061 0. 1152204411975930  
0. 3743662540953778 0. 1256338090252811 0. 1176203739139510  
0. 6175650565489619 0. 8824349662911359 0. 1152659773576161  
0. 8743766121641414 0. 6256242600297242 0. 1177191377724895  
0. 1321902997093716 0. 8678288076847309 0. 1354204640175638  
0. 3752631982029513 0. 6247198758273029 0. 1330250474491379  
0. 6321711976542446 0. 3678097201416506 0. 1354209184432804  
0. 8752796112144523 0. 1247363401198598 0. 1330247925188814  
0. 1303456712835995 0. 6346510158016017 0. 3775797763257174  
0. 3653637974567516 0. 8696472673182569 0. 3775517533658643  
0. 6303526236352681 0. 1346360200389327 0. 3775521914734910  
0. 8653486294661406 0. 3696546447970377 0. 3775792102054680  
0. 1152874487721007 0. 1196275951279944 0. 3730487552805641  
0. 3803722033472212 0. 3847124036099103 0. 3730495958672506  
0. 6152844466031340 0. 6196353237252978 0. 3731024289842537  
0. 8803644679188807 0. 8847147834239237 0. 3731028906330991  
0. 1256347310762607 0. 8743854851228150 0. 6177037774581891  
0. 3824309903956262 0. 6175788833472140 0. 6152326875453440  
0. 6256139011091975 0. 3743649098494686 0. 6177042292861259  
0. 8824210926183440 0. 1175697300025291 0. 6152326562306314  
0. 1247156633129194 0. 3752846938917500 0. 6330243408222103  
0. 3678152514159052 0. 1321842834226672 0. 6353553148273008  
0. 6247352492022316 0. 8752652213430281 0. 6330535161922981  
0. 8678075097318683 0. 6321918740248336 0. 6354555467238470  
0. 1346457302402442 0. 1303516563820679 0. 8775055854847196  
0. 3696485849362716 0. 3653548782394722 0. 8775052305281008  
0. 6346530777636872 0. 6303308963946250 0. 8776042127426322  
0. 8696694132495111 0. 8653473672945751 0. 8776032701042169  
0. 1196368557312937 0. 6152916885802426 0. 8730888394681529  
0. 3847253761151279 0. 8803678403369588 0. 8730670839822210  
0. 6196320650185356 0. 1152748317341548 0. 8730665446902961  
0. 8847086146818057 0. 3803629709478713 0. 8730890550700252  
0. 0032512495901571 0. 9967967777103013 0. 0047483763881786  
0. 5032033801947691 0. 4967488155591013 0. 0047486225402906

|                     |                     |                     |
|---------------------|---------------------|---------------------|
| 0. 2465227801134304 | 0. 2534772683489592 | 0. 2460475527709960 |
| 0. 7465141116099687 | 0. 7534858398840356 | 0. 2461156983172188 |
| 0. 4968005922167791 | 0. 0031991352213865 | 0. 5047331886326063 |
| 0. 9967537403219993 | 0. 5032461691142629 | 0. 5047626343467755 |
| 0. 2534830756575346 | 0. 7465175843773011 | 0. 7460815568520189 |
| 0. 7534827595383859 | 0. 2465167821656280 | 0. 7460812529920631 |
| 0. 1248423280106437 | 0. 6251438614274534 | 0. 1253910439549699 |
| 0. 3748578934829254 | 0. 8751588463567046 | 0. 1253532465548233 |
| 0. 6248409345055208 | 0. 1251421082818069 | 0. 1253534807752459 |
| 0. 8748563016741286 | 0. 3751579480701110 | 0. 1253912056722868 |
| 0. 1204142048942245 | 0. 8795877599407689 | 0. 3826073817202342 |
| 0. 3704370418280547 | 0. 6295799494489245 | 0. 3681844972106916 |
| 0. 6204121498771045 | 0. 3795859631351135 | 0. 3826073617882884 |
| 0. 8704200732330634 | 0. 1295627432150184 | 0. 3681840424632270 |
| 0. 1251354615253817 | 0. 1248563717022577 | 0. 6253276273579473 |
| 0. 3751431638335703 | 0. 3748645930436467 | 0. 6253280843654849 |
| 0. 6251198385092778 | 0. 6248450652660580 | 0. 6254169846597932 |
| 0. 8751552840230943 | 0. 8748798881519519 | 0. 6254166828630972 |
| 0. 1295721317661531 | 0. 3704281732798762 | 0. 8681824676482464 |
| 0. 3795961653544637 | 0. 1204035263767764 | 0. 8825101896990759 |
| 0. 6295976851778988 | 0. 8704023453189791 | 0. 8682181270033382 |
| 0. 8795997455397853 | 0. 6204004229457425 | 0. 8826330474605228 |

## Fe3O4\_Pb\_A

Fe3O4

1. 00000000000000

8. 4692844285620872      0. 0005042832979535      0. 0027449905961299

0. 0005045724375341      8. 4614631823769635      0. 0058281503736327

0. 0027411714136891      0. 0058114461106640      8. 4802794105790582

0      Fe      Pb

32      23      1

Direct

|                     |                     |                     |
|---------------------|---------------------|---------------------|
| 0. 1189602762399884 | 0. 3893266685543730 | 0. 1278534730868450 |
| 0. 3697103562040699 | 0. 1168760572864765 | 0. 1324301835866782 |
| 0. 6148464504834125 | 0. 8709995184395536 | 0. 1301508548175418 |
| 0. 8884178968649968 | 0. 6208539780632326 | 0. 1231273628261466 |
| 0. 1349284765442814 | 0. 8657393478719981 | 0. 1332754425620940 |
| 0. 3674588426957482 | 0. 6309584261594988 | 0. 1330833613754068 |
| 0. 6363793728199572 | 0. 3757943950283623 | 0. 1286875880904882 |
| 0. 8757921820610234 | 0. 1370264977720035 | 0. 1299367047636310 |
| 0. 1318645862854653 | 0. 6348904832627853 | 0. 3641411861857508 |

|                     |                     |                     |
|---------------------|---------------------|---------------------|
| 0. 3669869244379297 | 0. 8676431953133030 | 0. 3695965467837730 |
| 0. 6375356192471132 | 0. 1252410378440305 | 0. 3730597776672923 |
| 0. 8753495199706977 | 0. 3656129662893598 | 0. 3676473684886715 |
| 0. 1177048021972518 | 0. 1129331118020128 | 0. 3675545760737272 |
| 0. 3674784379787447 | 0. 3872115155292843 | 0. 3803370601413992 |
| 0. 6161922468280014 | 0. 6304622600944030 | 0. 3711249202335565 |
| 0. 8889183020617193 | 0. 8812316090282252 | 0. 3698415313974873 |
| 0. 1199708568893741 | 0. 8672769580980869 | 0. 6130611849162922 |
| 0. 3672615976993786 | 0. 6188845933790981 | 0. 6137617204551351 |
| 0. 5964488636184800 | 0. 3976330216862973 | 0. 6008262421200200 |
| 0. 8980647922049242 | 0. 1062183026617088 | 0. 5973948312240459 |
| 0. 1306809511263722 | 0. 3726753202307901 | 0. 6234233526763029 |
| 0. 3727365099195993 | 0. 1345452946358068 | 0. 6237228454458343 |
| 0. 6319451427429187 | 0. 8724359855998357 | 0. 6273759265051420 |
| 0. 8744826280177077 | 0. 6172774279550949 | 0. 6328026290942376 |
| 0. 1270705316775675 | 0. 1326574046940319 | 0. 8740061163851514 |
| 0. 3802967576373733 | 0. 3767183393015733 | 0. 8661241365683021 |
| 0. 6373546913549790 | 0. 6283282673075570 | 0. 8746600146221363 |
| 0. 8768162667193792 | 0. 8691970148404435 | 0. 8792607785945766 |
| 0. 1188359005622894 | 0. 6218696793190589 | 0. 8867355870595500 |
| 0. 3682091240918956 | 0. 8680159790602767 | 0. 8855319569730519 |
| 0. 6006245416072962 | 0. 1018648548924993 | 0. 8991685849478182 |
| 0. 8903897445188307 | 0. 4001914232757968 | 0. 9010339998767812 |
| 0. 0048091149910518 | 0. 0004415252893029 | 0. 0048155171605189 |
| 0. 5027820455003605 | 0. 5033806667467645 | 0. 0018916006596350 |
| 0. 2452209482500291 | 0. 2536715567439888 | 0. 2519500705327710 |
| 0. 7547663739209945 | 0. 7506172351596092 | 0. 2488663835479958 |
| 0. 5010589494226089 | 0. 9988149094273722 | 0. 4985250456972141 |
| 0. 0038929035315221 | 0. 5001255449454813 | 0. 4947165335517203 |
| 0. 2454402836691834 | 0. 7459032093884103 | 0. 7498367016072930 |
| 0. 1285301291041469 | 0. 6270244286197038 | 0. 1251670032159209 |
| 0. 3818988709684211 | 0. 8824169094534721 | 0. 1194819768178137 |
| 0. 6186622705930944 | 0. 1205331933659981 | 0. 1337075145539006 |
| 0. 8773396229950678 | 0. 3785820052148365 | 0. 1300514865504438 |
| 0. 1279797483496725 | 0. 8765047529124790 | 0. 3777137320012455 |
| 0. 3829388888510050 | 0. 6233729414431594 | 0. 3765465590352102 |
| 0. 6180444996662537 | 0. 3808293998785430 | 0. 3665857473155654 |
| 0. 8761964443423320 | 0. 1217026637477482 | 0. 3685621226629676 |
| 0. 1336135764343014 | 0. 1171088711797595 | 0. 6187629053941541 |
| 0. 3635587700084033 | 0. 3757883597532888 | 0. 6299107896165471 |
| 0. 6191756620400800 | 0. 6338690938268066 | 0. 6200000175054022 |
| 0. 8747369804500033 | 0. 8646773573673427 | 0. 6284599468558349 |
| 0. 1324094846785546 | 0. 3744470741426089 | 0. 8730470816985753 |
| 0. 3652726515974504 | 0. 1196670925204132 | 0. 8813289270272914 |

|                     |                     |                     |
|---------------------|---------------------|---------------------|
| 0. 6186197072477034 | 0. 8671218484853759 | 0. 8819198417931550 |
| 0. 8761676770254949 | 0. 6349588537056108 | 0. 8687994966997210 |
| 0. 7471712030534411 | 0. 2498495714050591 | 0. 7486151529542644 |

## Fe3O4\_Pb\_B

Fe3O4

|                      |                     |                      |
|----------------------|---------------------|----------------------|
| 1. 000000000000000   |                     |                      |
| 8. 4663730045984291  | 0. 0021034150496073 | -0. 0022207031356600 |
| 0. 0021031546738535  | 8. 4658079571534444 | 0. 0012311295571291  |
| -0. 0022207964420794 | 0. 0012317373638944 | 8. 4663387965787749  |

|    |    |    |
|----|----|----|
| 0  | Fe | Pb |
| 32 | 23 | 1  |

Direct

|                     |                     |                     |
|---------------------|---------------------|---------------------|
| 0. 1283179040110846 | 0. 3711376330279012 | 0. 1291637202861334 |
| 0. 3855441129402679 | 0. 1145179690364508 | 0. 1259648031368849 |
| 0. 6155270927055746 | 0. 8842685511047321 | 0. 1199197087704582 |
| 0. 8824472941737267 | 0. 6171281076286135 | 0. 1331945778155372 |
| 0. 1339224187584467 | 0. 8703578765267705 | 0. 1341863963998565 |
| 0. 3801002534222552 | 0. 6353739056012513 | 0. 1291586446109125 |
| 0. 6299160271566122 | 0. 3659180531032962 | 0. 1342910760803789 |
| 0. 8644221434090874 | 0. 1194497457930335 | 0. 1292450932994511 |
| 0. 1289722650784531 | 0. 6353840920797054 | 0. 3804242791145825 |
| 0. 3645440999304695 | 0. 8755850493255085 | 0. 3646488872772465 |
| 0. 6243722479686904 | 0. 1353080451660308 | 0. 3646313699371971 |
| 0. 8643813782846020 | 0. 3709816584062207 | 0. 3808734793255447 |
| 0. 1258062372994433 | 0. 1144317736160853 | 0. 3858147295480508 |
| 0. 3855566930752725 | 0. 3741281563852310 | 0. 3857317964405362 |
| 0. 6208334389265887 | 0. 6145131328024473 | 0. 3694791980865414 |
| 0. 8855280916211632 | 0. 8789342532460120 | 0. 3695251202290083 |
| 0. 1201514501934864 | 0. 8841483417675579 | 0. 6159308011368018 |
| 0. 3691651965233155 | 0. 6143529512697258 | 0. 6211873800128175 |
| 0. 6156204337085222 | 0. 3798601064086151 | 0. 6159318588193582 |
| 0. 8855782791894122 | 0. 1304900468061769 | 0. 6211292772988168 |
| 0. 1339086410767132 | 0. 3660435207506190 | 0. 6300410176459765 |
| 0. 3645014026885446 | 0. 1353541565029760 | 0. 6245407503613133 |
| 0. 6215484202262247 | 0. 8783862646601844 | 0. 6217472780214851 |
| 0. 8669991804925219 | 0. 6328500390969137 | 0. 6174627914217152 |
| 0. 1288817531085534 | 0. 1198389600366184 | 0. 8647477649902017 |
| 0. 3800862849242911 | 0. 3709718501229942 | 0. 8647745443249087 |
| 0. 6164079615776337 | 0. 6328847562012220 | 0. 8672479626637729 |

|                    |                    |                    |
|--------------------|--------------------|--------------------|
| 0.8669303550900801 | 0.8829545061194158 | 0.8672568288930989 |
| 0.1322194480173995 | 0.6171430037575838 | 0.8833258072789537 |
| 0.3689627512908300 | 0.8790171118953326 | 0.8857041418362352 |
| 0.6208500864711941 | 0.1307872537528118 | 0.8856107626981247 |
| 0.8825712155972220 | 0.3671812087113732 | 0.8831703665210392 |
| 0.0026481643813142 | 0.0006379435997237 | 0.0028043197547432 |
| 0.4992180388403836 | 0.4970353502712327 | 0.0030929626975445 |
| 0.2571339616938397 | 0.2427405609057766 | 0.2574554028593330 |
| 0.7468063619518226 | 0.7531279309295079 | 0.2505652498082290 |
| 0.4928453384148984 | 0.0070816702834436 | 0.4930121247589447 |
| 0.0026564379172697 | 0.4973758529675204 | 0.4996831117164436 |
| 0.2500804939701575 | 0.7525078413282831 | 0.7475280831788121 |
| 0.7471581153102919 | 0.2495397659827886 | 0.7471933695246432 |
| 0.1327869351103545 | 0.6170458781886721 | 0.1334334443782423 |
| 0.3747622060913104 | 0.8725486164559314 | 0.1227926269412395 |
| 0.6273422093585072 | 0.1251062812425817 | 0.1226720694979422 |
| 0.8829787417642710 | 0.3667623752100787 | 0.1336030041106491 |
| 0.1225816691467814 | 0.8725875411165113 | 0.3749924126212559 |
| 0.3749393029735015 | 0.6249098204380998 | 0.3751651874146835 |
| 0.6273905928437541 | 0.3772804078818596 | 0.3750570362834956 |
| 0.8750434775640844 | 0.1250010434889950 | 0.3751201245840575 |
| 0.1225919291378357 | 0.1251015746127805 | 0.6276795462113537 |
| 0.3748137035784413 | 0.3772840658586964 | 0.6276359217670783 |
| 0.6164158077095626 | 0.6328950701648979 | 0.6167855164405202 |
| 0.8671401959266334 | 0.8832004341967712 | 0.6168609573141792 |
| 0.1328507077726837 | 0.3669413192654694 | 0.8832836525108040 |
| 0.3748955465981101 | 0.1249669311873911 | 0.8751986138572240 |
| 0.6162104615045850 | 0.8834837677822183 | 0.8670038741454427 |
| 0.8741350415019464 | 0.6251558759313651 | 0.8753191733402258 |

## Fe3O4\_Bi\_A

Fe3O4

1.0000000000000000

|                     |                     |                    |
|---------------------|---------------------|--------------------|
| 8.4789790506236606  | -0.0016717599919904 | 0.0048276714165898 |
| -0.0016721647083598 | 8.4693255191467554  | 0.0151821458136737 |
| 0.0048250172230021  | 0.0151698910169921  | 8.4895701866221298 |

0 Fe Bi

32 23 1

Direct

|                    |                    |                    |
|--------------------|--------------------|--------------------|
| 0.1189033256673907 | 0.3897221039782138 | 0.1283472297870944 |
|--------------------|--------------------|--------------------|

|                     |                     |                     |
|---------------------|---------------------|---------------------|
| 0. 3695112180297634 | 0. 1173913559617514 | 0. 1324601243931200 |
| 0. 6153171163366158 | 0. 8711371386290645 | 0. 1302770508126881 |
| 0. 8884891308035230 | 0. 6212161634939166 | 0. 1236877685718245 |
| 0. 1351874867503173 | 0. 8658469320936852 | 0. 1332909346926681 |
| 0. 3674107235021298 | 0. 6312828228502645 | 0. 1331746994879218 |
| 0. 6363530360096267 | 0. 3760081538935043 | 0. 1285946182944886 |
| 0. 8757026693702662 | 0. 1371733811051807 | 0. 1298920141855061 |
| 0. 1320916451402682 | 0. 6349040771445286 | 0. 3640329699371989 |
| 0. 3670241070036404 | 0. 8675861985216745 | 0. 3695850546808364 |
| 0. 6376500091181633 | 0. 1252406561931538 | 0. 3733100898124545 |
| 0. 8751213567023458 | 0. 3650282723804544 | 0. 3681198439535375 |
| 0. 1176588560616369 | 0. 1129229490820972 | 0. 3667597878801771 |
| 0. 3668085269328010 | 0. 3871369453175734 | 0. 3805532905562158 |
| 0. 6162073171393694 | 0. 6305387002799091 | 0. 3710320134941374 |
| 0. 8891713797438981 | 0. 8804712004487447 | 0. 3697308440982532 |
| 0. 1198773479965031 | 0. 8660488343609444 | 0. 6132663112439732 |
| 0. 3665468604530658 | 0. 6186731169617643 | 0. 6139295032212718 |
| 0. 5952253611529689 | 0. 3976620654510787 | 0. 6010392415881741 |
| 0. 8988544106815189 | 0. 1032851546154990 | 0. 5963776669636245 |
| 0. 1298409533650381 | 0. 3718539722673221 | 0. 6235451397128066 |
| 0. 3730903397834099 | 0. 1344577312216782 | 0. 6235957167543226 |
| 0. 6321993170161405 | 0. 8726598586412579 | 0. 6272411166310251 |
| 0. 8741200890511184 | 0. 6162500341620309 | 0. 6322682671469002 |
| 0. 1265789232763981 | 0. 1329631423294444 | 0. 8737624992559566 |
| 0. 3804982527622963 | 0. 3769150696543302 | 0. 8663684998209770 |
| 0. 6372978872264133 | 0. 6284214576909730 | 0. 8745437741107399 |
| 0. 8767043616012815 | 0. 8703396182883127 | 0. 8791739401470985 |
| 0. 1187314490327832 | 0. 6222461637012072 | 0. 8869025176985071 |
| 0. 3680673263192226 | 0. 8682549879670818 | 0. 8851458506157005 |
| 0. 6008244755763643 | 0. 1027482876065893 | 0. 8986016278034104 |
| 0. 8906997770122070 | 0. 4013426783597482 | 0. 9023335068033278 |
| 0. 0051866273595086 | 0. 0004439529419928 | 0. 0053726180508979 |
| 0. 5024084337135731 | 0. 5039194443904249 | 0. 0022732658220027 |
| 0. 2453178042333438 | 0. 2539013478968298 | 0. 2517819572152177 |
| 0. 7548740900819843 | 0. 7506199458765521 | 0. 2489309056056291 |
| 0. 5007524217502332 | 0. 9984259473987558 | 0. 4981865677067458 |
| 0. 0042530133759975 | 0. 5000593664537905 | 0. 4940641949549978 |
| 0. 2457745823383921 | 0. 7457463734063803 | 0. 7501541181590227 |
| 0. 1285493624953141 | 0. 6274706509084778 | 0. 1253389920862481 |
| 0. 3825740397991892 | 0. 8831308115214842 | 0. 1189996916861738 |
| 0. 6183554445836517 | 0. 1205488334852268 | 0. 1339859415688250 |
| 0. 8776070794324742 | 0. 3793461733989386 | 0. 1310507933676618 |
| 0. 1283690152495929 | 0. 8765794989921407 | 0. 3779845667472053 |
| 0. 3832799365856032 | 0. 6231504482267283 | 0. 3765415383587462 |

|                     |                     |                     |
|---------------------|---------------------|---------------------|
| 0. 6173187330340011 | 0. 3809720599712567 | 0. 3662788093935803 |
| 0. 8764901374114863 | 0. 1204078616326584 | 0. 3679100185969759 |
| 0. 1344712093997806 | 0. 1157620468067334 | 0. 6178723422887267 |
| 0. 3623517144440849 | 0. 3760716317929171 | 0. 6300507725917094 |
| 0. 6182440648892991 | 0. 6343302112575417 | 0. 6197307339012095 |
| 0. 8750990814563827 | 0. 8627952798591413 | 0. 6290051019276806 |
| 0. 1326640457088643 | 0. 3750214974265552 | 0. 8734445123000569 |
| 0. 3647735076935080 | 0. 1198057412756183 | 0. 8814221302496534 |
| 0. 6182772119205941 | 0. 8671251362308303 | 0. 8820864250392478 |
| 0. 8763851763150138 | 0. 6362138464764924 | 0. 8687166751806671 |
| 0. 7488582301096484 | 0. 2504226677196175 | 0. 7478738130451661 |

## Fe3O4\_Bi\_B

Fe3O4

|                      |                     |                      |
|----------------------|---------------------|----------------------|
| 1. 0000000000000000  |                     |                      |
| 8. 4733819127518490  | 0. 0137277572161616 | -0. 0138054978275961 |
| 0. 0137277572161616  | 8. 4733819127518490 | 0. 0138054978275961  |
| -0. 0138068332338103 | 0. 0138068332338103 | 8. 4733146552446819  |

|    |    |    |
|----|----|----|
| 0  | Fe | Pb |
| 32 | 23 | 1  |

Direct

|                     |                     |                     |
|---------------------|---------------------|---------------------|
| 0. 1269941644874635 | 0. 3730058355125365 | 0. 1272356080730219 |
| 0. 3850680692143627 | 0. 1149319307856373 | 0. 1264260620171953 |
| 0. 6161218548105794 | 0. 8838781451894206 | 0. 1197513955594616 |
| 0. 8834994384463712 | 0. 6165005615536288 | 0. 1397848061703044 |
| 0. 1336938764745810 | 0. 8698478004672339 | 0. 1337221964018909 |
| 0. 3797672953616669 | 0. 6359945611054201 | 0. 1303257127721267 |
| 0. 6301521995327661 | 0. 3663061235254190 | 0. 1337221964018909 |
| 0. 8640054388945799 | 0. 1202327046383331 | 0. 1303257127721267 |
| 0. 1303452930181024 | 0. 6359580176490098 | 0. 3797410905663909 |
| 0. 3650631232220505 | 0. 8760944254787262 | 0. 3650537126805702 |
| 0. 6239055745212738 | 0. 1349368767779424 | 0. 3650537126805702 |
| 0. 8640419823509902 | 0. 3696547069818976 | 0. 3797410905663909 |
| 0. 1263706205068331 | 0. 1149088735130803 | 0. 3852298245388184 |
| 0. 3850911264869197 | 0. 3736293794931669 | 0. 3852298245388184 |
| 0. 6197996922602371 | 0. 6138882768225287 | 0. 3697973966824364 |
| 0. 8861117231774713 | 0. 8802003077397629 | 0. 3697973966824364 |
| 0. 1198643251229825 | 0. 8838199466010295 | 0. 6161770330558696 |
| 0. 3699311625858499 | 0. 6139064280263895 | 0. 6197841936304869 |
| 0. 6161800533989705 | 0. 3801356748770175 | 0. 6161770330558696 |
| 0. 8860935719736105 | 0. 1300688374141501 | 0. 6197841936304869 |
| 0. 1337455968668664 | 0. 3662544031331336 | 0. 6304334989876850 |

|                     |                     |                     |
|---------------------|---------------------|---------------------|
| 0. 3650848273375829 | 0. 1349151726624171 | 0. 6240789249142153 |
| 0. 6231287326068156 | 0. 8768712673931844 | 0. 6229821893828884 |
| 0. 8667965823061365 | 0. 6332034176938635 | 0. 6091796732121040 |
| 0. 1302822058394852 | 0. 1201596652617525 | 0. 8641463730845587 |
| 0. 3798403347382475 | 0. 3697177941605148 | 0. 8641463730845587 |
| 0. 6095157968420111 | 0. 6334031118577315 | 0. 8665610367268783 |
| 0. 8665968881422685 | 0. 8904842031579889 | 0. 8665610367268783 |
| 0. 1400834592734057 | 0. 6165233051230743 | 0. 8836725132319287 |
| 0. 3699408166200087 | 0. 8802701452983257 | 0. 8860961276555059 |
| 0. 6197298547016743 | 0. 1300591833799913 | 0. 8860961276555059 |
| 0. 8834766948769257 | 0. 3599165407265943 | 0. 8836725132319287 |
| 0. 0020772171715819 | 0. 0034385416078209 | 0. 0021951948637948 |
| 0. 4965614583921791 | 0. 4979227828284181 | 0. 0021951948637948 |
| 0. 2566658514069431 | 0. 2433341485930569 | 0. 2567895882306459 |
| 0. 7478958366588273 | 0. 7521041633411727 | 0. 2531068401984342 |
| 0. 4933628367553951 | 0. 0066371632446049 | 0. 4934118386120900 |
| 0. 0023603127460703 | 0. 4976396872539297 | 0. 4963897314586276 |
| 0. 2532877668547329 | 0. 7521002392323197 | 0. 7479331807341794 |
| 0. 7478997607676803 | 0. 2467122331452671 | 0. 7479331807341794 |
| 0. 1329445799041054 | 0. 6184689475925254 | 0. 1329990587623584 |
| 0. 3749514907969669 | 0. 8728885945770699 | 0. 1229810472557773 |
| 0. 6271114054229301 | 0. 1250485092030331 | 0. 1229810472557773 |
| 0. 8815310524074746 | 0. 3670554200958946 | 0. 1329990587623584 |
| 0. 1230207178828380 | 0. 8728657739311885 | 0. 3749803784551844 |
| 0. 3750496388481963 | 0. 6249158256400520 | 0. 3750287520778031 |
| 0. 6271342260688115 | 0. 3769792821171620 | 0. 3749803784551844 |
| 0. 8750841743599480 | 0. 1249503611518037 | 0. 3750287520778031 |
| 0. 1229886644961269 | 0. 1250148573190231 | 0. 6272874449938257 |
| 0. 3749851426809769 | 0. 3770113355038731 | 0. 6272874449938257 |
| 0. 6168311085472382 | 0. 6316171127161425 | 0. 6166232217860923 |
| 0. 8683828872838575 | 0. 8831688914527618 | 0. 6166232217860923 |
| 0. 1330229850194584 | 0. 3669770149805416 | 0. 8819237298339715 |
| 0. 3749672216496478 | 0. 1250327783503522 | 0. 8752042022558584 |
| 0. 6167872340809524 | 0. 8832127659190476 | 0. 8682106991775953 |
| 0. 8747740537979070 | 0. 6252259462020930 | 0. 8744202320029686 |
